# Supplementary material for: DGINN, an automated and highly-flexible pipeline for the detection of genetic innovations on protein-coding genes
Source: PubMed Central journal article supplement — Nucleic Acids Res. 2020 Sep 17;48(18):e103. doi: 10.1093/nar/gkaa680 (PMC7544217; doi:10.1093/nar/gkaa680), 2020-09-17
Supplement: gkaa680_supplemental_file.pdf [file gkaa680_supplemental_file.pdf]

Supplementary Information

Supplementary Table 1. Log likelihoods calculated by BIO++ and PAML codeml for each of the different models.

| File     | Method | M1        | M2        | M7        | M8        |
|----------|--------|-----------|-----------|-----------|-----------|
| APOBEC3F | BPP    | -2507,37  | -2491,43  | -2511,01  | -2491,47  |
|          | PAML   | -3945,63  | -3930,68  | -3945,88  | -3930,68  |
| FOXP2    | BPP    | -3997,30  | -3995,85  | -3999,96  | -3995,98  |
|          | PAML   | -5860,15  | -5858,43  | -5861,65  | -5858,44  |
| GADD45A  | BPP    | -1239,99  | -1239,99  | -1241,28  | -1238,69  |
|          | PAML   | -1291,75  | -1291,75  | -1292,06  | -1289,64  |
| GBP5     | BPP    | -6138,60  | -6131,37  | -6139,83  | -6131,78  |
|          | PAML   | -6516,42  | -6504,84  | -6518,34  | -6505,90  |
| GMPR     | BPP    | -3027,30  | -3027,30  | -3027,12  | -3025,84  |
|          | PAML   | -3425,82  | -3425,82  | -3423,78  | -3423,53  |
| HERC5    | BPP    | -10433,56 | -10430,06 | -10434,33 | -10430,37 |
|          | PAML   | -11950,25 | -11945,50 | -11951,66 | -11946,35 |
| IFI16    | BPP    | -11099,74 | -11075,12 | -11103,87 | -11075,78 |
|          | PAML   | -18264,89 | -18223,86 | -18270,40 | -18225,35 |
| ISG20    | BPP    | -1837,14  | -1837,14  | -1836,69  | -1836,69  |
|          | PAML   | -3048,57  | -3048,57  | -3047,88  | -3047,42  |
| MX1      | BPP    | -8537,86  | -8532,47  | -8543,10  | -8531,57  |
|          | PAML   | -11329,45 | -11316,93 | -11335,61 | -11317,74 |
| NT5C3A   | BPP    | -2324,85  | -2324,85  | -2324,19  | -2323,64  |
|          | PAML   | -4483,43  | -4483,43  | -4482,88  | -4482,16  |
| RB1      | BPP    | -6873,89  | -6873,89  | -6874,36  | -6872,91  |
|          | PAML   | -7244,38  | -7244,38  | -7242,93  | -7242,93  |
| RHO      | BPP    | -2910,93  | -2910,93  | -2913,24  | -2908,65  |
|          | PAML   | -2967,07  | -2967,07  | -2953,69  | -2953,12  |
| RSAD2    | BPP    | -4248,12  | -4248,12  | -4248,75  | -4243,00  |
|          | PAML   | -4875,51  | -4868,59  | -4874,28  | -4865,51  |
| SAMHD1   | BPP    | -7522,22  | -7495,71  | -7534,66  | -7497,30  |
|          | PAML   | -8219,63  | -8186,06  | -8225,38  | -8187,80  |
| SERINC3  | BPP    | -4751,87  | -4749,23  | -4755,82  | -4749,69  |
|          | PAML   | -5373,70  | -5370,57  | -5376,40  | -5371,08  |
| SHH      | BPP    | -3576,79  | -3576,79  | -3580,07  | -3575,89  |
|          | PAML   | -4855,15  | -4841,25  | -4853,34  | -4837,51  |
| SMC6     | BPP    | -8971,83  | -8971,83  | -8974,05  | -8970,65  |
|          | PAML   | -12342,77 | -12342,77 | -12341,63 | -12336,91 |
| TREX1    | BPP    | -3421,42  | -3421,42  | -3421,35  | -3421,15  |
|          | PAML   | -5080,28  | -5080,27  | -5080,76  | -5080,15  |
| ZC3HAV1  | BIO++  | -12413,91 | -12384,63 | -12418,39 | -12392,87 |
|          | PAML   | -17617,28 | -17585,61 | -17619,80 | -17585,77 |

**Supplementary Table 2. Overview of the running times of each of the positive selection methods in Step 8.**

|                 | <b>BUSTED</b> | <b>PAML M1 vs M2</b> | <b>PAML M7 vs M8</b> | <b>Bio++ M1 vs M2</b> | <b>Bio++ M7 vs M8</b> | <b>MEME</b> |
|-----------------|---------------|----------------------|----------------------|-----------------------|-----------------------|-------------|
| <b>APOBEC3F</b> | 00:02:06      | 00:09:09             | 00:55:26             | 01:37:42              | 00:59:40              | 00:18:18    |
| <b>FOXP2</b>    | 00:10:41      | 22:26:10             | 3 days, 2:56:09      | 00:22:23              | 02:49:05              | 00:14:29    |
| <b>GADD45A</b>  | 00:01:00      | 00:17:43             | 01:03:46             | 00:16:32              | 00:16:42              | 00:09:15    |
| <b>GBP5</b>     | 00:07:57      | 00:41:13             | 02:17:19             | 00:24:26              | 00:54:38              | 01:12:38    |
| <b>GMPR</b>     | 00:06:22      | 01:19:12             | 04:13:22             | 00:23:07              | 00:28:42              | 00:46:10    |
| <b>HERC5</b>    | 00:07:03      | 01:43:54             | 06:02:21             | 01:42:03              | 01:39:28              | 02:24:10    |
| <b>IFI16</b>    | 01:09:12      | 18:32:28             | 4 days, 1:14:47      | 01:28:31              | 01:22:09              | 03:19:20    |
| <b>ISG20</b>    | 00:04:04      | 01:23:59             | 04:51:58             | 00:20:49              | 00:18:46              | 00:29:56    |
| <b>MX1</b>      | 00:12:33      | 09:14:12             | 1 day, 0:17:30       | 01:14:08              | 03:18:13              | 01:56:16    |
| <b>NT5C3A</b>   | 00:17:33      | 13:42:28             | 1 day, 15:07:57      | 00:42:06              | 2 days, 0:47:25       | 10:08:30    |
| <b>RB1</b>      | 00:20:44      | 01:59:13             | 07:46:37             | 00:27:46              | 01:40:49              | 01:25:10    |
| <b>RHO</b>      | 00:02:46      | 00:12:45             | 00:34:20             | 00:15:19              | 00:24:46              | 00:24:53    |
| <b>RSAD2</b>    | 00:09:17      | 03:40:53             | 10:40:19             | 00:29:09              | 01:13:49              | 01:09:52    |
| <b>SAMHD1</b>   | 00:10:46      | 19:30:38             | 2 days, 6:50:22      | 01:23:20              | 02:07:07              | 02:32:58    |
| <b>SERINC3</b>  | 00:05:58      | 01:37:51             | 05:24:02             | 00:56:57              | 02:17:20              | 00:59:16    |
| <b>SHH</b>      | 00:04:46      | 00:56:20             | 03:15:44             | 00:13:25              | 00:54:23              | 00:34:22    |
| <b>SMC6</b>     | 00:16:53      | 14:16:56             | 1 day, 21:28:49      | 00:40:12              | 03:00:34              | 02:08:19    |
| <b>TREX1</b>    | 00:04:11      | 01:18:01             | 04:00:57             | 00:22:24              | 01:46:02              | 00:04:34    |
| <b>ZC3HAV1</b>  | 00:16:12      | 11:03:56             | 1 day, 10:43:01      | 01:36:41              | 04:24:26              | 01:54:47    |
